# Supplementary material for: miR-29b negatively regulates MMP2 to impact gastric cancer development by suppress gastric cancer cell migration and tumor growth
Source: PubMed Central journal article supplement — J Cancer. 2018 Oct 1;9(20):3776–86. doi: 10.7150/jca.26263 (PMC6216010; doi:10.7150/jca.26263), 2018-10-01
Supplement: jcav09p3776s1.pdf [file jcav09p3776s1.pdf]

## **SUPPLEMENTAL INFORMATION**

*Wang et al.*

### **Supplemental figure and table legends**

**Figure S1 Schematic graphs for the plasmids used in the current study.**

**Figure S2 Overexpression of miR-29b significantly reduced MMP2 and MMP9 activity.** BGC823 cells were transfected with miRNA expression plasmids or control plasmid as indicated. Cell medium was harvested for Gel Zymography analysis 24 h after the transfection.

**Figure S3 Sequence alignment showing that miR-29-5ps are evolutionarily conserved in human.**

**Table S1 Plasmids and the primers used for their construction. Lic, ligation independent cloning.**

**Table S2 A list of the primers used for qPCR analyses of mRNAs and miRNAs. LNA, locked nucleic acid.**

**Table S3 A list of the antibodies used for immunoblots (IB) in current study.**

Figure S1

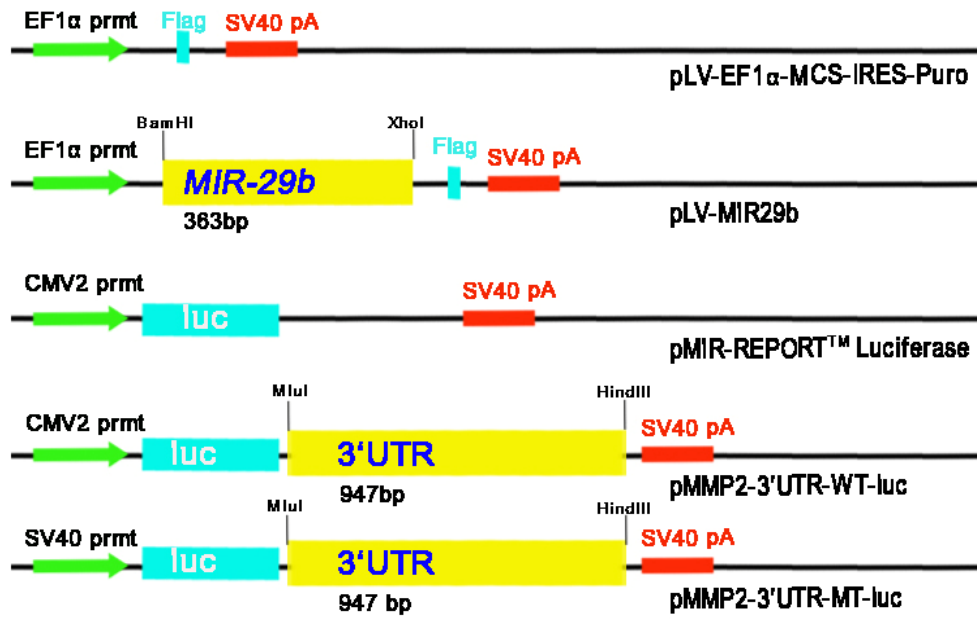

Figure S2

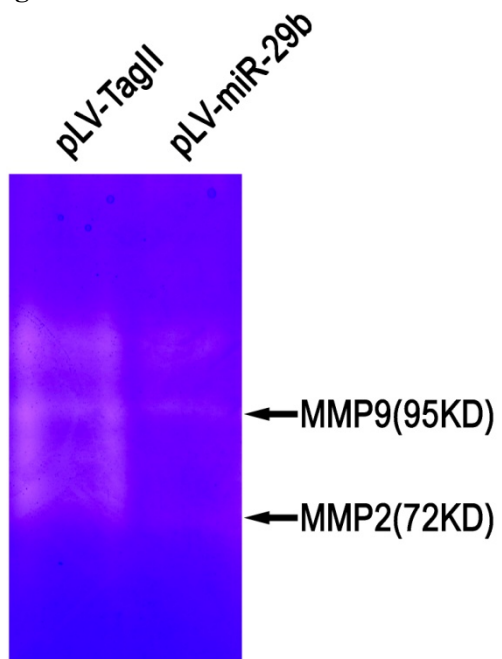

**Figure S3**

(1) 1 10 26

hsa-miR-29a-5p (1) --ACUGAUUUUCUUUUGGUGUUCAG--

hsa-miR-29b-1-5p (1) --G CUGGUUUC AUAUGGUGGUUAGA

hsa-miR-29b-2-5p (1) ---CUGGUUUCACAUGGUGGCUUAG--

hsa-miR-29c-5p (1) UGACCGAUUUUCUCCUGGUGUUC----

Consensus (1) ACUGGUUUCUUAUGGUGUUUAG

**Table S1**

| <b>Plasmid</b>      | <b>Backbone vector</b>               | <b>Template</b>    | <b>Primer sequence (from 5' → 3')</b>                                                                                           | <b>Gene ID</b> | <b>Insert size (bp)</b> |
|---------------------|--------------------------------------|--------------------|---------------------------------------------------------------------------------------------------------------------------------|----------------|-------------------------|
| pLV-MIR29b          | pLV-EF1 $\alpha$ -MCS-IRES-Puro      | BGC823 genomic DNA | Forward (lic):<br><u>AGAGAAATTCGGATCCAATAAGGGAGTCCCAGGCATG</u><br>Reverse (lic):<br><u>CCATGGCTCGAGCCCTTCTCACAGCCATCCTGCTGT</u> | MI0000105      | 363                     |
| pMMP2-3'UT R-WT-luc | pMIR-REPORT <sup>TM</sup> Luciferase | BGC823 cDNA        | Forward: CG <u>ACGCGT</u> GCCTGGAGAACTAGAGAAGGA<br>Reverse: CCC <u>AAGCTT</u> CAGGGCTCTTTCTACAGGAC                              | NM_004530.5    | 947                     |
| pMMP2-3'UT R-MT-luc | pMIR-REPORT <sup>TM</sup> Luciferase | BGC823 cDNA        | Forward:<br>CTGCTTTGGGCTGCCCTG <u>C(G)TC(G)</u> CTGCCACA <u>CTTC</u><br>Reverse: GAGCAGGGCAGCCCAAAGCAGGGCTGCG                   | NM_004530.5    | 947                     |

**Table S2**

| <b>Gene</b> | <b>Gene ID</b> | <b>Primer sequence (5' → 3')</b>                                                                                                                     | <b>Amplicon (bp)</b> |
|-------------|----------------|------------------------------------------------------------------------------------------------------------------------------------------------------|----------------------|
| miR-29b     | MIMAT0000100   | Reverse transcription:<br>GTCGTATCCAGTGC GTGTCGTGGAGTCGGCAATTGCACTGGATACGACTAACACT<br>Forward: GGGGTAGCACCATTTGAA (LNA)<br>Reverse: TGCGTGTCGTGGAGTC | 65                   |
| U6          | NR_004394.1    | Reverse transcription: CGCTTCACGAATTTGCGTGTCAT<br>Forward: GCTTCGGCAGCACATATACTAAAAT (LNA)<br>Reverse: CGCTTCACGAATTTGCGTGTCAT                       | 89                   |
| MMP2        | NM_004530.5    | Forward: ATCCTATGACAGCTGCACCAC<br>Reverse: CACCTTCTGAGTTCCCACCAA                                                                                     | 140                  |
| 18S rRNA    | NR_003286.2    | Forward: CGACGACCCATTCGAACGTCT<br>Reverse: CTCTCCGGAATCGAACCCTGA                                                                                     | 102                  |

**Table S3**

| <b>Antibody</b>         | <b>Cat#</b> | <b>Dilution/ Working concentration</b> | <b>Supplier</b>                                     |
|-------------------------|-------------|----------------------------------------|-----------------------------------------------------|
| Goat anti-Mouse IgG     | 31430       | 1:5000                                 | Pierce<br>Biotechnology, Inc.,<br>Rockford, IL, USA |
| Goat anti-Rabbit IgG    | 31360       | 1:5000                                 | Pierce                                              |
| anti- $\alpha$ -tubulin | sc-5286     | 1:5000                                 | Santa Cruz<br>Biotechnology, Inc.,<br>CA, USA       |
| anti- $\beta$ -actin    | sc-47778    | 1:5000                                 | Santa Cruz                                          |
| anti-MMP2               | ab92536     | 1:3000                                 | Abcam, Cambridge,<br>London, UK                     |
| anti-PCNA               | sc-7907     | 1:3000                                 | Santa Cruz                                          |
